# Supplementary material for: Talimogene laherparepvec in combination with ipilimumab versus ipilimumab alone for advanced melanoma: 5-year final analysis of a multicenter, randomized, open-label, phase II trial
Source: PubMed Central journal article supplement — J Immunother Cancer. 2023 May 2;11(5):e006270. doi: 10.1136/jitc-2022-006270 (PMC10163510; doi:10.1136/jitc-2022-006270), 2023-05-02
Supplement: jitc-2022-006270supp001.pdf [file jitc-2022-006270supp001.pdf]

### Supplemental figure 1: Study design and treatment schema

#### Talimogene laherparepvec in combination with ipilimumab versus ipilimumab alone for advanced melanoma: 5-year final analysis of a multicenter, randomized, open-label, phase II trial

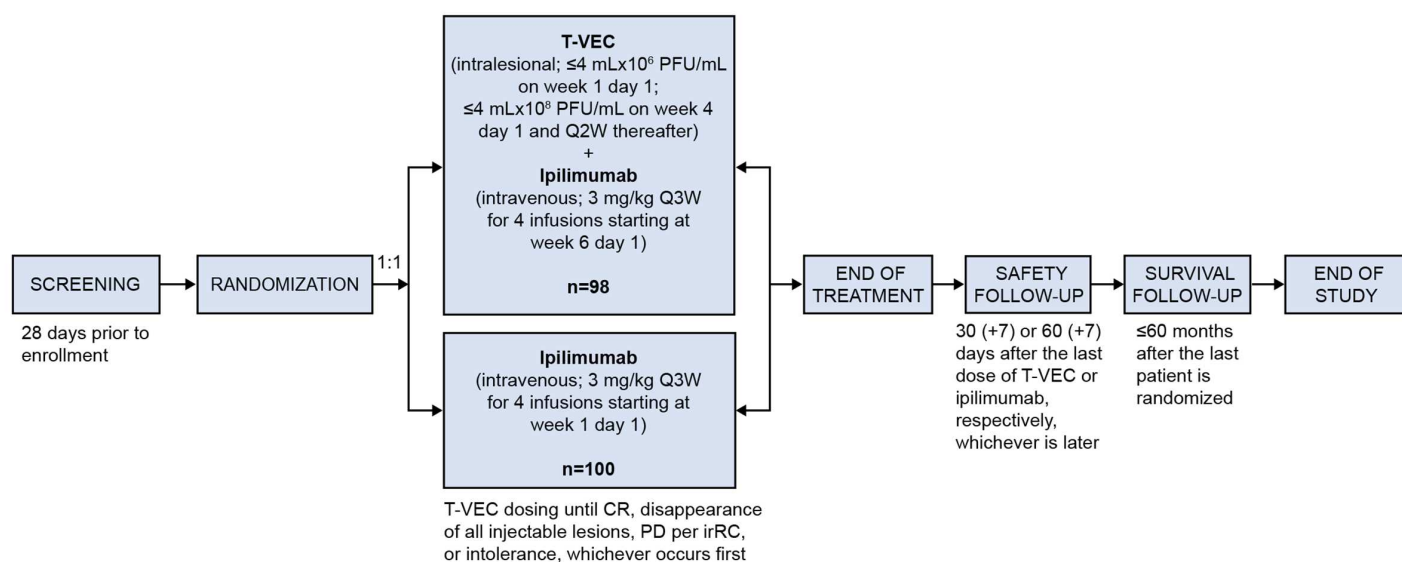

CR, complete response; irRC, immune-related response criteria; PD, progressive disease; PFU, plaque-forming unit; Q2W, every 2 weeks; Q3W, every 3 weeks; T-VEC, talimogene laherparepvec.
