# Supplementary material for: Talimogene laherparepvec in combination with ipilimumab versus ipilimumab alone for advanced melanoma: 5-year final analysis of a multicenter, randomized, open-label, phase II trial
Source: PubMed Central journal article supplement — J Immunother Cancer. 2023 May 2;11(5):e006270. doi: 10.1136/jitc-2022-006270 (PMC10163510; doi:10.1136/jitc-2022-006270), 2023-05-02
Supplement: jitc-2022-006270supp002.pdf [file jitc-2022-006270supp002.pdf]

1 **SUPPLEMENTAL MATERIAL**

2 **Talimogene laherparepvec in combination with ipilimumab versus ipilimumab alone**  
3 **for advanced melanoma: 5-year final analysis of a multicenter, randomized, open-**  
4 **label, phase II trial**

5  
6 **End points and assessments**

7 Responses were assessed by investigators per immune-related response criteria (irRC)  
8 every 12 weeks until disease progression. Objective response rate was defined as the  
9 incidence rate of patients with a complete response (CR) or partial response (PR) in patients  
10 with stage IIIB–IV melanoma. The disease control rate was defined as the incidence rate of  
11 patients with a CR/PR or stable disease (SD). Durable response rate (DRR) was defined as  
12 the incidence rate of patients with a duration of response per modified irRC of  $\geq 6$  months.  
13 SD was defined as being no earlier than 77 days after the date of enrollment/randomization.  
14 Time to response was measured from the date of randomization to the date of the first  
15 confirmed CR or PR per modified irRC. Patients who did not have a confirmed CR/PR were  
16 censored at their last evaluable tumor assessment date. Duration of response (calculated  
17 only for patients with an objective response per modified irRC) was defined as the time from  
18 the first confirmed objective response to confirmed disease progression per modified irRC or  
19 death, whichever occurred earlier. Responses were censored at the last assessment not  
20 confirming disease progression. Progression-free survival (PFS) was measured from the  
21 date of randomization to the date of disease progression (as measured by modified irRC) or  
22 death, whichever occurred first. Patients with no documented disease progression or death  
23 while on study were censored at the last disease assessment date. Treatment-emergent  
24 adverse events (AEs) were defined as AEs that occurred after the first dose through 30 days  
25 after the last administration of talimogene laherparepvec or 60 days after the last  
26 administration of ipilimumab, whichever occurred later. The Medical Dictionary for  
27 Regulatory Activities v23.1 was used to code AEs to a system organ class (SOC) and a  
28 preferred term within the SOC.

## 29 **Statistical analysis**

30 Best overall response categories (response evaluation by investigator using modified irRC)  
31 were summarized (number and percentage) by treatment arm as randomized. Disease  
32 control rate and DRR were summarized with exact binomial two-sided 95% CI reported by  
33 treatment. Wilson score method with continuity correction was used to calculate an  
34 approximate 95% CI for the between-arm difference in binary rates. The HR for overall  
35 survival (OS) and two-sided 95% CI were estimated using an unstratified Cox proportional  
36 hazards model.

37 Kaplan-Meier curves for OS were generated by treatment arm. Kaplan-Meier estimates and  
38 the 95% CIs for within each treatment and between treatment differences of annual OS rates  
39 were provided. The CI for treatment annual rate differences was based on variance  
40 estimates using Greenwood's formula. The CIs for the Kaplan-Meier quartiles were provided  
41 by treatment arm. OS was compared with an unstratified log-rank test using a two-sided  
42 significance level of 0.05.

43 Analyses of time to response, duration of response, and PFS by investigator using modified  
44 irRC were the same as those described for OS, except that all p values were descriptive.  
45 Time to response and duration of response were analyzed for responders without treatment  
46 arm comparisons.

## 47 **Baseline demographics**

48 Sixty-two (63.3%) patients in the combination arm and 55 (55.0%) patients in the ipilimumab  
49 arm were men, and most patients (99.0% and 92.0%, respectively) were White. The mean  
50 (standard deviation) age was 63.6 (14.0) years in the combination arm and 64.2 (13.3) years  
51 in the ipilimumab arm. Most patients (70.4%, combination arm; 73.0%, ipilimumab arm) had  
52 an Eastern Cooperative Oncology Group performance status of 0. Overall, 54.0% of patients  
53 had earlier stages of disease (stage IIIB to IVM1a) and 46.0% of patients had more  
54 advanced disease (stage IVM1b/c), with similar percentages between treatment arms.

55 Baseline lactate dehydrogenase (LDH) levels were  $\leq$ upper limit of normal (ULN) in 80.6% of  
56 patients in the combination arm and 74.0% of patients in the ipilimumab arm. Elevated LDH  
57 levels of  $>1$  and up to 2 times the ULN were reported in a lower percentage of patients in the  
58 combination arm (10.2%) than in the ipilimumab arm (20.0%); LDH levels  $>2$  times the ULN  
59 were reported in 7.1% of patients in the combination arm and 5.0% of patients in the  
60 ipilimumab arm. Approximately one-third of patients in each treatment arm had tumors that  
61 tested positive for the *BRAF* V600E or V600K mutation. The mean (standard deviation)  
62 baseline sum of the products of the two largest perpendicular diameters of all index lesions  
63 was 2163.79 (4317.12) mm<sup>2</sup> in the combination arm and 1731.77 (2644.60) mm<sup>2</sup> in the  
64 ipilimumab arm. In the combination arm, 64.3% of patients were seropositive for herpes  
65 simplex virus 1 at baseline. Twenty-five (25.5%) patients in the combination arm and 29  
66 (29.0%) patients in the ipilimumab arm reported prior anticancer therapies. The most  
67 frequently reported prior anticancer therapies in the combination arm and the ipilimumab arm  
68 were immunotherapy (29.4% and 41.3%, respectively), radiotherapy (25.5% and 32.6%),  
69 and chemotherapy (13.7% and 10.9%). Overall, most patients (96.5%) had no prior line of  
70 systemic therapy.

71
