# Supplementary material for: Talimogene laherparepvec in combination with ipilimumab versus ipilimumab alone for advanced melanoma: 5-year final analysis of a multicenter, randomized, open-label, phase II trial
Source: PubMed Central journal article supplement — J Immunother Cancer. 2023 May 2;11(5):e006270. doi: 10.1136/jitc-2022-006270 (PMC10163510; doi:10.1136/jitc-2022-006270), 2023-05-02
Supplement: jitc-2022-006270supp005.pdf [file jitc-2022-006270supp005.pdf]

**Product: Talimogene Laherparepvec**  
**Clinical Study Report: 20110264**  
**Date: 03 August 2021**

---

**Page 1**

**16.1.3 List of IECs or IRBs and Representative Written Information  
for Subject and Sample Consent Forms**

Names and institutional addresses of IECs and IRBs are provided below.

Representative consent forms are on file and are available on request.

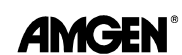

**Product: Talimogene Laherparepvec**  
**Clinical Study Report: 20110264**  
**Date: 03 August 2021**

Page 2

| Study Number | Site Number | Site Name                                                          | IRB/IEC Name                                                                            | IRB/IEC Address                                                                   | Regional IRB/IEC Name                                                   | Regional IRB/IEC Address                           |
|--------------|-------------|--------------------------------------------------------------------|-----------------------------------------------------------------------------------------|-----------------------------------------------------------------------------------|-------------------------------------------------------------------------|----------------------------------------------------|
| 20110264     | 25002       | Centre Hospitalier Universitaire de Bordeaux - Hôpital Saint André | Comité de Protection des Personnes Ile de France I - Hopital Hotel Dieu                 | 1 Place du Parvis Notre Dame, Paris, 75004, France                                | Comité de Protection des Personnes Ile de France I - Hopital Hotel Dieu | 1 Place du Parvis Notre Dame, Paris, 75004, France |
| 20110264     | 25004       | Hopital Saint Louis                                                | Comité de Protection des Personnes Ile de France I - Hopital Hotel Dieu                 | 1 Place du Parvis Notre Dame, Paris, 75004, France                                | Comité de Protection des Personnes Ile de France I - Hopital Hotel Dieu | 1 Place du Parvis Notre Dame, Paris, 75004, France |
| 20110264     | 25007       | Centre Hospitalier Universitaire de Nantes, Hôpital Hôtel Dieu     | Comité de Protection des Personnes Ile de France I - Hopital Hotel Dieu                 | 1 Place du Parvis Notre Dame, Paris, 75004, France                                | Comité de Protection des Personnes Ile de France I - Hopital Hotel Dieu | 1 Place du Parvis Notre Dame, Paris, 75004, France |
| 20110264     | 26001       | Universitätsklinikum Schleswig-Holstein                            | Ethik-Kommission der Medizinischen Fakultät der Christian-Albrechts-Universität zu Kiel | Schwänenweg 20, Kiel, 24105, Germany                                              | Ethikkommission der Medizinischen Fakultät am Universitätsklinikum      | Gartenstrasse 47, Tübingen, 72074, Germany         |
| 20110264     | 26002       | Universitätsklinikum Tübingen                                      | Ethikkommission der Medizinischen Fakultät am Universitätsklinikum                      | Gartenstrasse 47, Tübingen, 72074, Germany                                        | Ethikkommission der Medizinischen Fakultät am Universitätsklinikum      | Gartenstrasse 47, Tübingen, 72074, Germany         |
| 20110264     | 26004       | Universitätsmedizin Göttingen - Georg-August-Universität           | Ethikkommission der Medizinischen Fakultät am Universitätsklinikum                      | Gartenstrasse 47, Tübingen, 72074, Germany                                        | Ethikkommission der Medizinischen Fakultät am Universitätsklinikum      | Gartenstrasse 47, Tübingen, 72074, Germany         |
| 20110264     | 66002       | Allina Health System dba Virginia Piper Cancer Institute           | Quorum Review Inc                                                                       | 1501 4th Avenue, Suite 800, Seattle, WA, 98101, United States                     |                                                                         |                                                    |
| 20110264     | 66003       | University of Utah Huntsman Cancer Institute                       | University of Utah IRB                                                                  | 75 South 2000 East, Salt Lake City, UT, 84112, United States                      |                                                                         |                                                    |
| 20110264     | 66004       | University of Louisville James Graham Brown Cancer Center          | University of Louisville IRB Human Subjects Protection Program Office                   | 501 East Broadway, MedCenter One, Suite 200, Louisville, KY, 40202, United States |                                                                         |                                                    |

**Product: Talimogene Laherparepvec**  
**Clinical Study Report: 20110264**  
**Date: 03 August 2021**

Page 3

| Study Number | Site Number | Site Name                                                          | IRB/IEC Name                                                                        | IRB/IEC Address                                                                             | Regional IRB/IEC Name | Regional IRB/IEC Address |
|--------------|-------------|--------------------------------------------------------------------|-------------------------------------------------------------------------------------|---------------------------------------------------------------------------------------------|-----------------------|--------------------------|
| 20110264     | 66005       | University of Arizona Cancer Center                                | WCG, Western Institutional Review Board Copernicus Group, IRB                       | 1019 39th Avenue Southeast, Suite 120, Puyallup, WA, 98374, United States                   |                       |                          |
| 20110264     | 66007       | University of California Los Angeles                               | University of California at Los Angeles Office of Human Research Protection Program | 11000 Kinross Avenue, Los Angeles, CA, 90095, United States                                 |                       |                          |
| 20110264     | 66008       | University of Colorado Cancer Center                               | Colorado Multiple Institutional Review Board                                        | 13001 East 17th Place, Building 500, Room N3214, Box F490, Aurora, CO, 80045, United States |                       |                          |
| 20110264     | 66009       | San Francisco Oncology Associates Medical Group Inc                | WCG, Western Institutional Review Board Copernicus Group, IRB                       | 1019 39th Avenue Southeast, Suite 120, Puyallup, WA, 98374, United States                   |                       |                          |
| 20110264     | 66010       | Vanderbilt University Medical Center                               | Vanderbilt University IRB                                                           | 1313 21st Avenue South, 504 Oxford House, Nashville, TN, 37232, United States               |                       |                          |
| 20110264     | 66011       | University of Texas MD Anderson Cancer Center                      | University of Texas MD Anderson Cancer Center Institutional Review Board            | 1515 Holcombe Boulevard, Unit 198, Houston, TX, 77030, United States                        |                       |                          |
| 20110264     | 66012       | The Angeles Clinic and Research Institute, West Los Angeles Office | WCG, Western Institutional Review Board Copernicus Group, IRB                       | 1019 39th Avenue Southeast, Suite 120, Puyallup, WA, 98374, United States                   |                       |                          |

**Product: Talimogene Laherparepvec**  
**Clinical Study Report: 20110264**  
**Date: 03 August 2021**

Page 4

| Study Number | Site Number | Site Name                                                             | IRB/IEC Name                                                                          | IRB/IEC Address                                                                                       | Regional IRB/IEC Name | Regional IRB/IEC Address |
|--------------|-------------|-----------------------------------------------------------------------|---------------------------------------------------------------------------------------|-------------------------------------------------------------------------------------------------------|-----------------------|--------------------------|
| 20110264     | 66013       | University of Southern California, Norris Comprehensive Cancer Center | University of Southern California, Health Sciences Institutional Review Board         | 1200 North State Street, Suite 4700, Los Angeles, CA, 90033, United States                            |                       |                          |
| 20110264     | 66015       | Indiana University Melvin and Bren Simon Cancer Center                | Indiana University Institutional Review Board                                         | 980 Indiana Avenue, Room 3351, Indianapolis, IN, 46202, United States                                 |                       |                          |
| 20110264     | 66016       | University of Iowa Hospital and Clinics                               | University of Iowa IRB                                                                | 600 Newton Road, 105 Hardin Library for the Health Sciences, Iowa City, IA, 52242, United States      |                       |                          |
| 20110264     | 66017       | University of North Carolina at Chapel Hill                           | University of North Carolina at Chapel Hill, Office of Human Research Ethics          | 720 Martin Luther King Jr. Boulevard, Building 385, 2nd Floor., Chapel Hill, NC, 27599, United States |                       |                          |
| 20110264     | 66020       | Icahn School of Medicine at Mount Sinai                               | Program for the Protection of Human Subjects, Icahn School of Medicine at Mount Sinai | 1 Gustave L Levy Place, Box 1081, New York, NY, 10029, United States                                  |                       |                          |
| 20110264     | 66022       | Mayo Clinic Florida                                                   | Mayo Clinic Institutional Review Board                                                | 200 1st Street Southwest, 201 Building, Room 4-60, Rochester, MN, 55905, United States                |                       |                          |
| 20110264     | 66024       | Saint Louis University Hospital                                       | Saint Louis University IRB                                                            | 3556 Caroline Street, Caroline Building, Room C110, St Louis, MO, 63104, United States                |                       |                          |

**Product: Talimogene Laherparepvec**  
**Clinical Study Report: 20110264**  
**Date: 03 August 2021**

Page 5

| Study Number | Site Number | Site Name                                             | IRB/IEC Name                                                               | IRB/IEC Address                                                                    | Regional IRB/IEC Name | Regional IRB/IEC Address |
|--------------|-------------|-------------------------------------------------------|----------------------------------------------------------------------------|------------------------------------------------------------------------------------|-----------------------|--------------------------|
| 20110264     | 66025       | The Medical College of Wisconsin                      | Medical College of Wisconsin Froedtert Hospital Institutional Review Board | 8701 Watertown Plank Road, HRC-MACC FUND 3040, Milwaukee, WI, 53226, United States |                       |                          |
| 20110264     | 66033       | Medical University of South Carolina                  | Medical University of South Carolina, Office of Research Integrity IRB     | 19 Hagood Avenue, Suite 601, MSC 857, Charleston, SC, 29425, United States         |                       |                          |
| 20110264     | 66034       | University of Cincinnati Medical Center               | University of Cincinnati IRB                                               | 51 Goodman Drive, University Hall Suite 300, Cincinnati, OH, 45221, United States  |                       |                          |
| 20110264     | 66036       | Mount Sinai Comprehensive Cancer Center               | Mount Sinai Medical Center IRB                                             | 4300 Alton Road, Miami Beach, FL, 33140, United States                             |                       |                          |
| 20110264     | 66037       | Virginia Commonwealth University Massey Cancer Center | WCG, Western Institutional Review Board Copernicus Group, IRB              | 1019 39th Avenue Southeast, Suite 120, Puyallup, WA, 98374, United States          |                       |                          |
| 20110264     | 66039       | Columbia University Medical Center                    | Columbia University Medical Center Institutional Review Board              | 154 Haven Avenue, 1st Floor, New York, NY, 10032, United States                    |                       |                          |
| 20110264     | 66041       | Hematology Oncology Associates                        | Western Institutional Review Board                                         | 1019 39th Avenue Southeast, Suite 120, Puyallup, WA, 98374, United States          |                       |                          |
| 20110264     | 66043       | Beverly Hills Cancer Center                           | WCG, Western Institutional Review Board Copernicus Group, IRB              | 1019 39th Avenue Southeast, Suite 120, Puyallup, WA, 98374, United States          |                       |                          |

**Product: Talimogene Laherparepvec****Clinical Study Report: 20110264****Date: 03 August 2021****Page 6**

| Study Number | Site Number | Site Name                              | IRB/IEC Name                                                  | IRB/IEC Address                                                           | Regional IRB/IEC Name | Regional IRB/IEC Address |
|--------------|-------------|----------------------------------------|---------------------------------------------------------------|---------------------------------------------------------------------------|-----------------------|--------------------------|
| 20110264     | 66044       | Rutgers Cancer Institute of New Jersey | WCG, Western Institutional Review Board Copernicus Group, IRB | 1019 39th Avenue Southeast, Suite 120, Puyallup, WA, 98374, United States |                       |                          |
| 20110264     | 66045       | Morristown Medical Center              | Atlantic Health System IRB                                    | 475 South Street, Morristown, NJ, 07960, United States                    |                       |                          |
